# Supplementary material for: Rapid Response of Nitrogen Cycling Gene Transcription to Labile Carbon Amendments in a Soil Microbial Community
Source: PubMed Central journal article supplement (PMC8125072; doi:10.1128/msystems.00161-21), 2021-05-11
Supplement: mSystems.00161-21-st001.pdf [file mSystems.00161-21-st001.pdf]

| <b>Process</b>             | <b>Gene Name</b>        | <b>Product Name [E.C.]</b>                                                      |
|----------------------------|-------------------------|---------------------------------------------------------------------------------|
| a) Assimilatory nitr       | <i>NIT-6</i>            | nitrite reductase (NAD(P)H) [EC:1.7.1.4]                                        |
|                            | <i>nirA</i>             | ferredoxin-nitrite reductase [EC:1.7.7.1]                                       |
|                            | <i>nasB</i>             | assimilatory nitrate reductase electron transfer subunit [EC:1.7.99.-]          |
|                            | <i>narB</i>             | ferredoxin-nitrate reductase [EC:1.7.7.2]                                       |
|                            | <i>nasA</i>             | assimilatory nitrate reductase catalytic subunit [EC:1.7.99.-]                  |
|                            | <i>NR</i>               | nitrate reductase (NAD(P)H) [EC:1.7.1.1 1.7.1.2 1.7.1.3]                        |
| b) Complete nitrific       | <i>narG, narZ, nxrA</i> | nitrate reductase / nitrite oxidoreductase, alpha subunit [EC:1.7.5.1 1.7.99.-] |
|                            | <i>narH, narY, nxrB</i> | nitrate reductase / nitrite oxidoreductase, beta subunit [EC:1.7.5.1 1.7.99.-]  |
|                            | <i>hao</i>              | hydroxylamine dehydrogenase [EC:1.7.2.6]                                        |
|                            | <i>pmoA-amoA</i>        | methane/ammonia monooxygenase subunit A [EC:1.14.18.3 1.14.99.39]               |
|                            | <i>pmoB-amoB</i>        | methane/ammonia monooxygenase subunit B                                         |
|                            | <i>pmoC-amoC</i>        | methane/ammonia monooxygenase subunit C                                         |
| c) Denitrification         | <i>nirK</i>             | nitrite reductase (NO-forming) [EC:1.7.2.1]                                     |
|                            | <i>narG, narZ, nxrA</i> | nitrate reductase / nitrite oxidoreductase, alpha subunit [EC:1.7.5.1 1.7.99.-] |
|                            | <i>narH, narY, nxrB</i> | nitrate reductase / nitrite oxidoreductase, beta subunit [EC:1.7.5.1 1.7.99.-]  |
|                            | <i>narI, narV</i>       | nitrate reductase gamma subunit [EC:1.7.5.1 1.7.99.-]                           |
|                            | <i>nosZ</i>             | nitrous-oxide reductase [EC:1.7.2.4]                                            |
|                            | <i>norC</i>             | nitric oxide reductase subunit C                                                |
|                            | <i>napA</i>             | periplasmic nitrate reductase NapA [EC:1.7.99.-]                                |
|                            | <i>napB</i>             | cytochrome c-type protein NapB                                                  |
|                            | <i>norB</i>             | nitric oxide reductase subunit B [EC:1.7.2.5]                                   |
|                            | <i>nirS</i>             | nitrite reductase (NO-forming) / hydroxylamine reductase [EC:1.7.2.1 1.7.99.1]  |
|                            | <i>CYP55</i>            | fungal nitric oxide reductase [EC:1.7.1.14]                                     |
| d) Dissimilatory nitr      | <i>nirB</i>             | nitrite reductase (NADH) large subunit [EC:1.7.1.15]                            |
|                            | <i>nirD</i>             | nitrite reductase (NADH) small subunit [EC:1.7.1.15]                            |
|                            | <i>narG, narZ, nxrA</i> | nitrate reductase / nitrite oxidoreductase, alpha subunit [EC:1.7.5.1 1.7.99.-] |
|                            | <i>narH, narY, nxrB</i> | nitrate reductase / nitrite oxidoreductase, beta subunit [EC:1.7.5.1 1.7.99.-]  |
|                            | <i>narI, narV</i>       | nitrate reductase gamma subunit [EC:1.7.5.1 1.7.99.-]                           |
|                            | <i>napA</i>             | periplasmic nitrate reductase NapA [EC:1.7.99.-]                                |
|                            | <i>napB</i>             | cytochrome c-type protein NapB                                                  |
|                            | <i>nrfA</i>             | nitrite reductase (cytochrome c-552) [EC:1.7.2.2]                               |
|                            | <i>nrfH</i>             | cytochrome c nitrite reductase small subunit                                    |
| e) Glutamate Dehydrogenase | <i>gudB, rocG</i>       | glutamate dehydrogenase [EC:1.4.1.2]                                            |
|                            | <i>GLUD1_2, gdhA</i>    | glutamate dehydrogenase (NAD(P)+) [EC:1.4.1.3]                                  |
|                            | <i>gdhA</i>             | glutamate dehydrogenase (NADP+) [EC:1.4.1.4]                                    |
|                            | <i>GDH2</i>             | glutamate dehydrogenase [EC:1.4.1.2]                                            |
| f) GS-GOGAT                | <i>GLT1</i>             | glutamate synthase (NADH) [EC:1.4.1.14]                                         |
|                            | <i>gltB</i>             | glutamate synthase (NADPH) large chain [EC:1.4.1.13]                            |

|                   |                                                      |
|-------------------|------------------------------------------------------|
| <i>gltD</i>       | glutamate synthase (NADPH) small chain [EC:1.4.1.13] |
| <i>GLU, gltS</i>  | glutamate synthase (ferredoxin) [EC:1.4.7.1]         |
| <i>glnA, GLUL</i> | glutamine synthetase [EC:6.3.1.2]                    |

g) Nitrate assimilat *NRT, narK, nrtP, na*: MFS transporter, NNP family, nitrate/nitrite transporter

|                         |                                                                   |
|-------------------------|-------------------------------------------------------------------|
| <i>nrtA, nasF, cynA</i> | nitrate/nitrite transport system substrate-binding protein        |
| <i>nrtB, nasE, cynB</i> | nitrate/nitrite transport system permease protein                 |
| <i>nrtC, nasD</i>       | nitrate/nitrite transport system ATP-binding protein [EC:3.6.3.-] |
| <i>nrtD, cynD</i>       | nitrate/nitrite transport system ATP-binding protein              |

h) Nitrification

|                  |                                                                   |
|------------------|-------------------------------------------------------------------|
| <i>hao</i>       | hydroxylamine dehydrogenase [EC:1.7.2.6]                          |
| <i>pmoA-amoA</i> | methane/ammonia monooxygenase subunit A [EC:1.14.18.3 1.14.99.39] |
| <i>pmoB-amoB</i> | methane/ammonia monooxygenase subunit B                           |
| <i>pmoC-amoC</i> | methane/ammonia monooxygenase subunit C                           |

i) Nitrogen fixation

|             |                                                               |
|-------------|---------------------------------------------------------------|
| <i>anfG</i> | nitrogenase delta subunit [EC:1.18.6.1]                       |
| <i>nifD</i> | nitrogenase molybdenum-iron protein alpha chain [EC:1.18.6.1] |
| <i>nifH</i> | nitrogenase iron protein NifH                                 |
| <i>nifK</i> | nitrogenase molybdenum-iron protein beta chain [EC:1.18.6.1]  |
| <i>vnfD</i> | vanadium-dependent nitrogenase alpha chain [EC:1.18.6.2]      |
| <i>vnfK</i> | vanadium-dependent nitrogenase beta chain [EC:1.18.6.2]       |
| <i>vnfG</i> | vanadium nitrogenase delta subunit [EC:1.18.6.2]              |
| <i>vnfH</i> | vanadium nitrogenase iron protein                             |

j) N Regulation

|                   |                                                 |
|-------------------|-------------------------------------------------|
| <i>glnD</i>       | [protein-PII] uridylyltransferase [EC:2.7.7.59] |
| <i>glnB</i>       | nitrogen regulatory protein P-II 1              |
| <i>glnK</i>       | nitrogen regulatory protein P-II 2              |
| <i>glnL; ntrB</i> | nitrogen regulation sensor histidine kinase     |
| <i>glnG; ntrC</i> | nitrogen regulation response regulator          |
