# Supplementary material for: Rapid Response of Nitrogen Cycling Gene Transcription to Labile Carbon Amendments in a Soil Microbial Community
Source: PubMed Central journal article supplement (PMC8125072; doi:10.1128/msystems.00161-21), 2021-05-11
Supplement: mSystems.00161-21-st002.pdf [file mSystems.00161-21-st002.pdf]

| Process                        | KO Number | Gene                    | Base Count | Log <sub>2</sub> Fold Change ± SE |         |               |         |               |         |
|--------------------------------|-----------|-------------------------|------------|-----------------------------------|---------|---------------|---------|---------------|---------|
|                                |           |                         |            | Hour 8                            |         | Hour 24       |         | Hour 48       |         |
| Ammonium Transport             | K03320    | <i>amt</i>              | 26803      | <b>4.028</b>                      | ± 0.395 | <b>3.946</b>  | ± 0.395 | <b>3.259</b>  | ± 0.395 |
| Assimilatory nitrate reduction | K00360    | <i>nasB</i>             | 134        | 9.118                             | ± 1.076 | <b>8.407</b>  | ± 1.078 | <b>7.731</b>  | ± 1.079 |
|                                | K17877    | <i>NIT-6</i>            | 48         | <b>8.082</b>                      | ± 1.120 | <b>6.589</b>  | ± 1.126 | <b>4.927</b>  | ± 1.138 |
|                                | K10534    | <i>NR</i>               | 24         | <b>6.909</b>                      | ± 1.082 | <b>6.142</b>  | ± 1.089 | <b>2.909</b>  | ± 1.146 |
|                                | K00372    | <i>nasA</i>             | 1096       | <b>5.757</b>                      | ± 0.441 | <b>5.484</b>  | ± 0.442 | <b>4.432</b>  | ± 0.442 |
|                                | K00367    | <i>narB</i>             | 48         | <b>7.295</b>                      | ± 1.095 | <b>6.263</b>  | ± 1.099 | <b>3.542</b>  | ± 1.124 |
|                                | K00366    | <i>nirA</i>             | 337        | <b>4.802</b>                      | ± 0.805 | <b>5.545</b>  | ± 0.806 | <b>6.420</b>  | ± 0.805 |
| Nitrification                  | K10946    | <i>pmoC-amoC</i>        | 8186       | -1.587                            | ± 0.897 | -1.667        | ± 0.897 | -0.490        | ± 0.897 |
|                                | K10945    | <i>pmoB-amoB</i>        | 2929       | -1.331                            | ± 0.691 | <b>-2.187</b> | ± 0.692 | -0.856        | ± 0.691 |
|                                | K10944    | <i>pmoA-amoA</i>        | 3928       | -2.125                            | ± 0.745 | <b>-2.365</b> | ± 0.746 | -1.122        | ± 0.745 |
|                                | K10535    | <i>hao</i>              | 111        | <b>-2.475</b>                     | ± 0.518 | <b>-2.687</b> | ± 0.529 | <b>-1.394</b> | ± 0.520 |
|                                | K00371    | <i>narH, narY, nxrB</i> | 1570       | <b>-2.088</b>                     | ± 0.533 | <b>-2.348</b> | ± 0.533 | <b>-1.282</b> | ± 0.533 |
|                                | K00370    | <i>narG, narZ, nxrA</i> | 2020       | <b>-2.322</b>                     | ± 0.597 | <b>-2.177</b> | ± 0.597 | -0.492        | ± 0.597 |
| Denitrification                | K15864    | <i>nirS</i>             | 25         | -0.986                            | ± 0.619 | 1.578         | ± 0.603 | <b>1.933</b>  | ± 0.600 |
|                                | K04561    | <i>norB</i>             | 43         | -1.004                            | ± 0.505 | 0.001         | ± 0.509 | -0.179        | ± 0.511 |
|                                | K02568    | <i>napB</i>             | 12         | -1.049                            | ± 1.160 | 2.834         | ± 1.126 | 1.138         | ± 1.145 |
|                                | K02567    | <i>napA</i>             | 176        | <b>-0.834</b>                     | ± 0.242 | <b>1.159</b>  | ± 0.240 | <b>0.927</b>  | ± 0.241 |
|                                | K02305    | <i>norC</i>             | 17         | -0.357                            | ± 0.618 | 0.916         | ± 0.620 | 0.972         | ± 0.621 |
|                                | K00376    | <i>nosZ</i>             | 85         | <b>-1.999</b>                     | ± 0.345 | -0.509        | ± 0.345 | -0.139        | ± 0.343 |
|                                | K00374    | <i>narI, narV</i>       | 47         | 0.073                             | ± 0.512 | <b>3.286</b>  | ± 0.495 | <b>3.513</b>  | ± 0.494 |

|                      |        |                                 |       |                 |              |                 |              |                 |              |
|----------------------|--------|---------------------------------|-------|-----------------|--------------|-----------------|--------------|-----------------|--------------|
|                      | K00371 | <i>narH, narY, nxrB</i>         | 1570  | <b>-2.088</b> ± | <b>0.533</b> | <b>-2.348</b> ± | <b>0.533</b> | <b>-1.282</b> ± | <b>0.533</b> |
|                      | K00370 | <i>narG, narZ, nxrA</i>         | 2020  | <b>-2.322</b> ± | <b>0.597</b> | <b>-2.177</b> ± | <b>0.597</b> | -0.492 ±        | 0.597        |
|                      | K00368 | <i>nirK</i>                     | 3823  | <b>-1.888</b> ± | <b>0.584</b> | <b>-2.652</b> ± | <b>0.584</b> | <b>-1.362</b> ± | <b>0.584</b> |
| DNRA                 | K15876 | <i>nrfH</i>                     | 10    | -0.390 ±        | 0.756        | -1.253 ±        | 0.808        | 0.493 ±         | 0.767        |
|                      | K03385 | <i>nrfA</i>                     | 34    | -1.049 ±        | 0.421        | -0.612 ±        | 0.431        | -0.720 ±        | 0.434        |
|                      | K02568 | <i>napB</i>                     | 12    | -1.049 ±        | 1.160        | 2.834 ±         | 1.126        | 1.138 ±         | 1.145        |
|                      | K02567 | <i>napA</i>                     | 176   | <b>-0.834</b> ± | <b>0.242</b> | <b>1.159</b> ±  | <b>0.240</b> | <b>0.927</b> ±  | <b>0.241</b> |
|                      | K00374 | <i>narI, narV</i>               | 47    | 0.073 ±         | 0.512        | <b>3.286</b> ±  | <b>0.495</b> | <b>3.513</b> ±  | <b>0.494</b> |
|                      | K00371 | <i>narH, narY, nxrB</i>         | 1570  | <b>-2.088</b> ± | <b>0.533</b> | <b>-2.348</b> ± | <b>0.533</b> | <b>-1.282</b> ± | <b>0.533</b> |
|                      | K00370 | <i>narG, narZ, nxrA</i>         | 2020  | <b>-2.322</b> ± | <b>0.597</b> | <b>-2.177</b> ± | <b>0.597</b> | -0.492 ±        | 0.597        |
|                      | K00363 | <i>nirD</i>                     | 873   | <b>6.184</b> ±  | <b>0.481</b> | <b>6.306</b> ±  | <b>0.481</b> | <b>6.065</b> ±  | <b>0.481</b> |
|                      | K00362 | <i>nirB</i>                     | 3230  | <b>7.702</b> ±  | <b>0.421</b> | <b>7.426</b> ±  | <b>0.421</b> | <b>6.538</b> ±  | <b>0.421</b> |
| GDH                  | K00262 | <i>EC 1.4.1.4, gdhA</i>         | 111   | <b>1.542</b> ±  | <b>0.312</b> | 0.494 ±         | 0.320        | -0.108 ±        | 0.325        |
|                      | K00261 | <i>EC 1.4.1.3 GLUD1_2, gdhA</i> | 469   | <b>-0.991</b> ± | <b>0.299</b> | -0.837 ±        | 0.301        | -0.532 ±        | 0.300        |
|                      | K00260 | <i>EC 1.4.1.2 gudB, rocG</i>    | 26    | -0.809 ±        | 0.899        | 2.326 ±         | 0.884        | <b>2.229</b> ±  | <b>0.884</b> |
|                      | K15371 | <i>EC 1.4.1.2 GDH2</i>          | 310   | 0.820 ±         | 0.433        | <b>1.350</b> ±  | <b>0.434</b> | 0.696 ±         | 0.435        |
| GS-GOGAT             | K01915 | <i>glnA, GLUL</i>               | 26238 | <b>2.809</b> ±  | <b>0.314</b> | <b>2.395</b> ±  | <b>0.314</b> | <b>1.819</b> ±  | <b>0.314</b> |
|                      | K00284 | <i>GLU, gltS</i>                | 1376  | <b>2.412</b> ±  | <b>0.230</b> | <b>1.604</b> ±  | <b>0.231</b> | <b>0.930</b> ±  | <b>0.232</b> |
|                      | K00266 | <i>gltD</i>                     | 1491  | <b>2.962</b> ±  | <b>0.310</b> | <b>1.781</b> ±  | <b>0.310</b> | <b>1.075</b> ±  | <b>0.311</b> |
|                      | K00265 | <i>gltB</i>                     | 3365  | <b>3.762</b> ±  | <b>0.289</b> | <b>3.048</b> ±  | <b>0.289</b> | <b>2.295</b> ±  | <b>0.289</b> |
|                      | K00264 | <i>GLT1</i>                     | 68    | <b>3.656</b> ±  | <b>0.513</b> | <b>3.458</b> ±  | <b>0.518</b> | <b>2.059</b> ±  | <b>0.527</b> |
| Nitrate assimilation | K15579 | <i>nrtD, cynD</i>               | 4     | 2.792 ±         | 1.739        | 3.859 ±         | 1.747        | 2.931 ±         | 1.769        |
|                      | K15578 | <i>nrtC, nasD</i>               | 474   | <b>9.289</b> ±  | <b>1.051</b> | <b>9.549</b> ±  | <b>1.051</b> | <b>7.181</b> ±  | <b>1.053</b> |
|                      | K15577 | <i>nrtB, nasE, cynB</i>         | 610   | <b>8.921</b> ±  | <b>0.935</b> | <b>9.277</b> ±  | <b>0.935</b> | <b>7.470</b> ±  | <b>0.936</b> |
|                      | K15576 | <i>nrtA, nasF, cynA</i>         | 1493  | <b>10.200</b> ± | <b>0.968</b> | <b>10.556</b> ± | <b>0.968</b> | <b>9.010</b> ±  | <b>0.969</b> |

|                   |        |                              |      |                             |                             |                             |
|-------------------|--------|------------------------------|------|-----------------------------|-----------------------------|-----------------------------|
|                   | K02575 | <i>NRT, narK, nrtP, nasA</i> | 1447 | <b>6.643</b> ± <b>0.514</b> | <b>6.875</b> ± <b>0.514</b> | <b>5.552</b> ± <b>0.515</b> |
| Nitrogen fixation | K02591 | <i>nifK</i>                  | 25   | -1.209 ± 1.693              | <b>7.529</b> ± <b>1.410</b> | <b>3.941</b> ± <b>1.437</b> |
|                   | K02588 | <i>nifH</i>                  | 203  | -0.598 ± 1.512              | <b>8.980</b> ± <b>1.441</b> | 2.648 ± 1.464               |
|                   | K02586 | <i>nifD</i>                  | 54   | 1.049 ± 1.622               | <b>8.684</b> ± <b>1.557</b> | <b>3.640</b> ± <b>1.589</b> |
