# Supplementary material for: Rapid Response of Nitrogen Cycling Gene Transcription to Labile Carbon Amendments in a Soil Microbial Community
Source: PubMed Central journal article supplement (PMC8125072; doi:10.1128/msystems.00161-21), 2021-05-11
Supplement: mSystems.00161-21-st003.pdf [file mSystems.00161-21-st003.pdf]

A)

|           | <u>KO Number</u> | <u>Gene</u>            | <u>SIMPER %<br/>Dissimilarity</u> |
|-----------|------------------|------------------------|-----------------------------------|
| t8 vs t0  | K03043           | <i>rpoB</i>            | 0.11                              |
|           | K03046           | <i>rpoC</i>            | 0.11                              |
|           | K06994           | <i>RND superfamily</i> | 0.1                               |
| t24 vs t0 | K02529           | <i>lacI, galR</i>      | 0.15                              |
|           | K10117           | <i>msmE</i>            | 0.14                              |
|           | K17318           | <i>lplA</i>            | 0.14                              |
| t48 vs t0 | K02529           | <i>lacI, galR</i>      | 0.15                              |
|           | K02004           | <i>ABC.CD.P</i>        | 0.14                              |
|           | K10117           | <i>msmE</i>            | 0.13                              |

---

**B)**

| <b>KO_number</b> | <b>Gene</b>       | <b>Description</b>                                   | <b>Time (h)</b> | <b>Normalized Counts</b> | <b>se</b> | <b>LFC</b> | <b>se</b> | <b>FDR</b> |
|------------------|-------------------|------------------------------------------------------|-----------------|--------------------------|-----------|------------|-----------|------------|
| K06296           | <i>gerKB</i>      | spore germination protein KB                         | 24              | 420.45                   | ± 16.7    | 8.84       | ± 1.1     | 1.32E-14   |
| K06307           | <i>yfkQ</i>       | spore germination protein                            | 24              | 90.42                    | ± 20.7    | 8.47       | ± 1.3     | 2.60E-09   |
| K10017           | <i>hisP</i>       | histidine transport system ATP-binding protein       | 24              | 66.67                    | ± 10.9    | 8.04       | ± 1.3     | 2.61E-08   |
| K03488           | <i>licT, bglG</i> | beta-glucoside operon transcriptional antiterminator | 24              | 65.76                    | ± 16.9    | 8.00       | ± 1.3     | 3.10E-08   |
| K06297           | <i>gerKC</i>      | spore germination protein KC                         | 24              | 424.27                   | ± 63.5    | 7.87       | ± 1.0     | 3.20E-13   |
| K07717           | <i>ycbA, glnK</i> | two-component system, sensor histidine kinase YcbA   | 24              | 55.77                    | ± 2.9     | 7.78       | ± 1.3     | 1.50E-07   |
| K18701           | <i>arsC</i>       | arsenate-mycothioli transferase                      | 24              | 54.89                    | ± 5.5     | 7.75       | ± 1.4     | 1.61E-06   |
| K06311           | <i>yndE</i>       | spore germination protein                            | 24              | 53.74                    | ± 6.2     | 7.72       | ± 1.3     | 1.93E-07   |
| K02251           | <i>comQ</i>       | competence protein ComQ                              | 24              | 53.14                    | ± 10.4    | 7.70       | ± 1.4     | 9.69E-07   |
| K10015           | <i>hisM</i>       | histidine transport system permease protein          | 24              | 52.03                    | ± 4.3     | 7.68       | ± 1.4     | 3.05E-06   |
